# Supplementary material for: Bacterial quorum sensing signals reshape phycosphere functions to regulate colony morphology in Phaeocystis globosa
Source: Research Square preprint supplement (doi:10.21203/rs.3.rs-8771247/v1), 2026-02-10
Supplement: Supplementary file 1 [file d560d22cfabf80fe05a6fec8.docx]

**Supplementary Materials for:**

**Bacterial quorum sensing signals reshape phycosphere functions to regulate colony morphology in *Phaeocystis globosa***

**1. Molecular information of *P. globosa* in this study**

Partial chloroplast gene of *P. globosa* strain:

>NH7_1_k97_255851_gene_27

ATGGCACCAAGATTTAAATTAAATATACTTTGGTTAGAAAATGAACTAGGAATTGCAATAGATCAACTTCAAGCCGGAGAACAAATTCCATTAACAGATTACTTTTTTTGGCCAAAAAGTGATACGTGGGACCAGATTCGACAAGAGTTAGAAACTAAACCATGGATTCTAACGAAAGAAAAAGCTCAACTTTTAAATGCAACAGCAACAATTATGAACGAGTGGCAAAATTCTATGAATAAAACAGCAAAGTAG

Partial 18S rRNA sequence of *P. globosa* strain:

>OTU674 Z6_2a_63196

CAGCCGCGGTAATTCCAGCTCCAGTAGCGTATATTAAAGTTGTTGCAGTTAAAACGCTCGTAGTCGGGTTTCGGGTCGGGCCGAGCGGTCTGCCGATGGGTATGCACTGTTTGGCGCGGCCTTCTTTCCGGAGACCGCGGCTACTCTTAACTGAGCGGGCGTGGGAGACGGATCGTTTACTTTGAAAAAATCAGAGTGTTTCAAGCAGGCAGCTCGCTCTTGCATGGTACAGCATGGGATGATAGAATAGGACCTTAATTCTATTTTGTTGGTTTCTAGAGTTGAGGTAATGATTAACAGGGACAGTCAGGGGCACTCGTATTCCGTCGAGAGAGGTGAAATTCTCAGACCAATGGAAGACGAACCACTGCGAAAGCATTTGCCAGGGATGTTTTCACTGATCAAGAACGAAAGTTAGGGGAT

**2. Supplementary Figures**


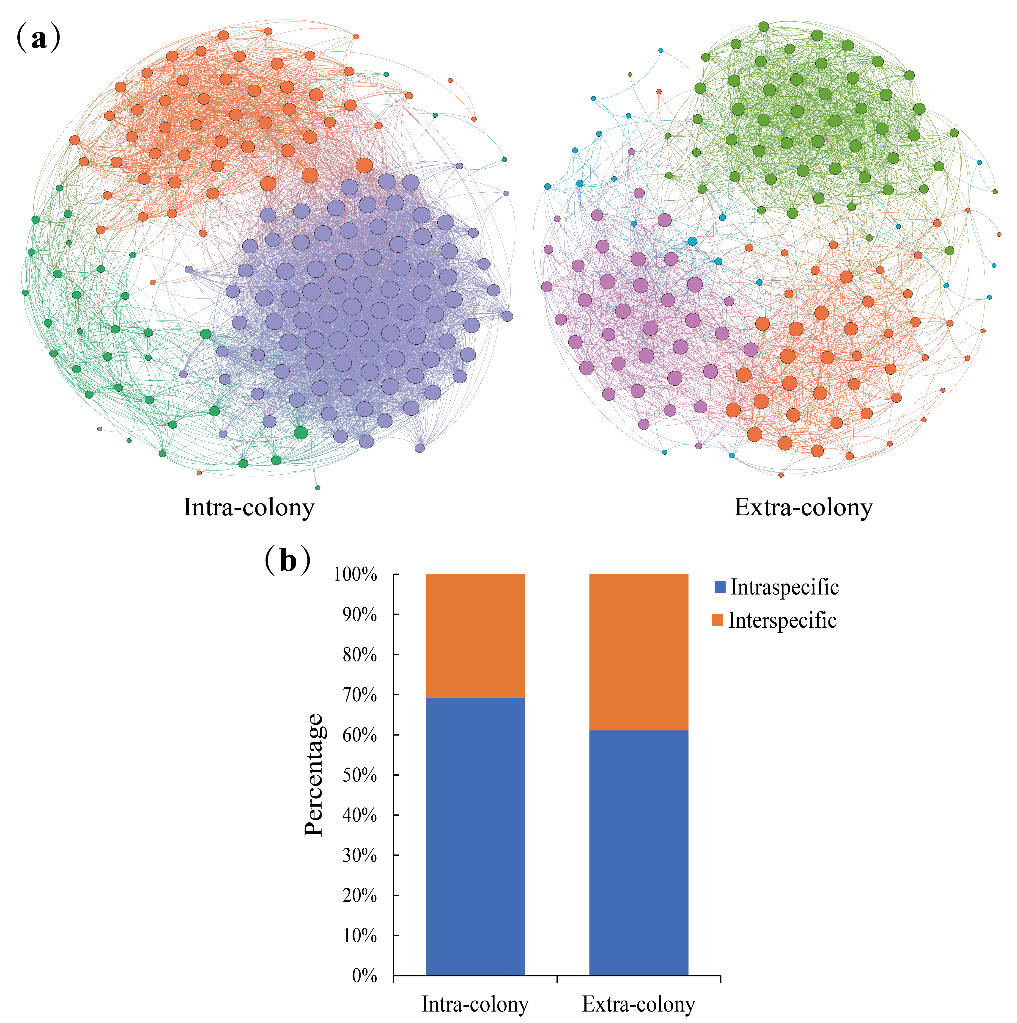


**Figure S1.** Differences in QS network complexity and signaling modes between intra- and extra-colonial bacterial communities. (**a**) Interaction networks of QS functional genes of intra- and extra-colonies. Nodes represent QS genes, and edges indicate significant co-occurrence or interaction relationships. (**b**) Relative proportions of intraspecific (e.g., AHL-based) and interspecific (e.g., AI-2-based) QS signaling in the two environments.


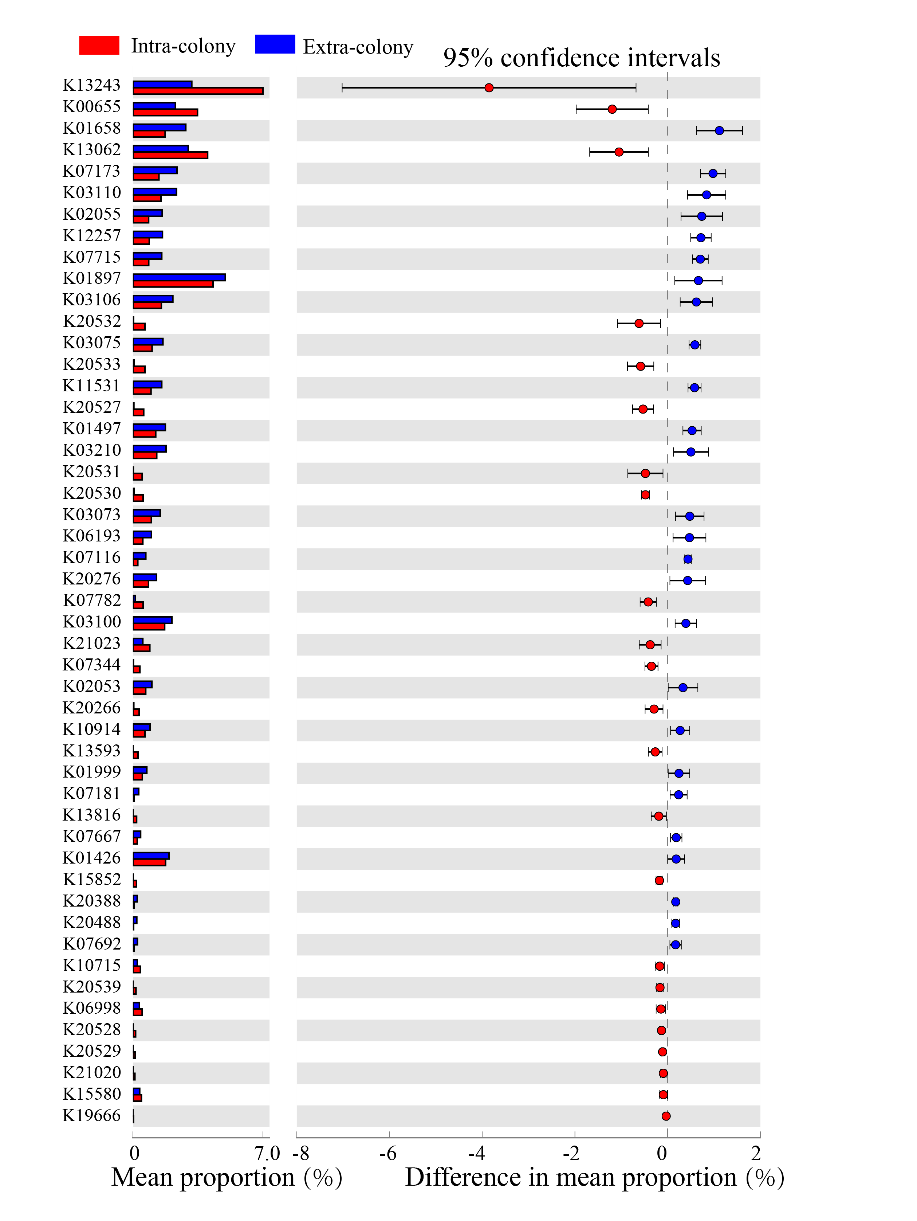


**Figure S2.** Differential enrichment of QS-related genes between intra- and extra-colonial bacterial communities.


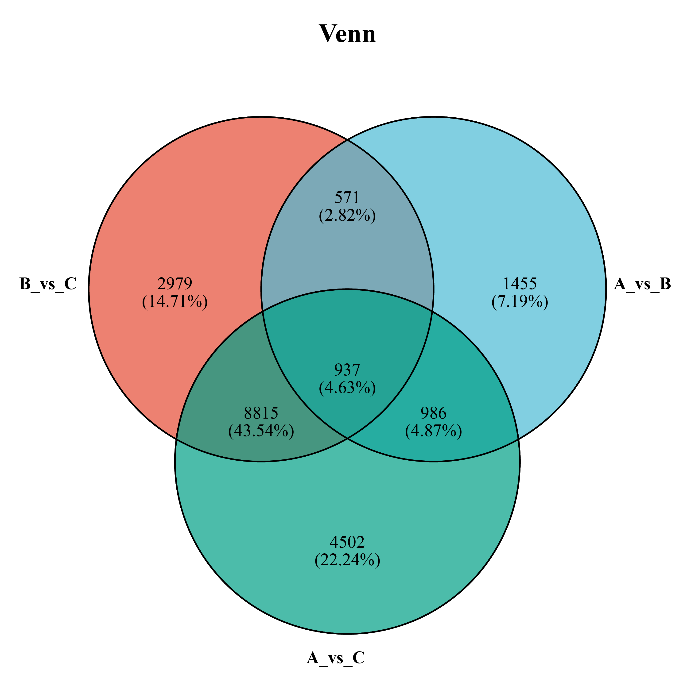


**Figure S3.** The overlap of differentially expressed genes (DEGs) identified from the pairwise comparisons among groups A, B, and C. Numbers represent the count of DEGs, with the percentage relative to the total number of DEGs in the comparison given in parentheses.


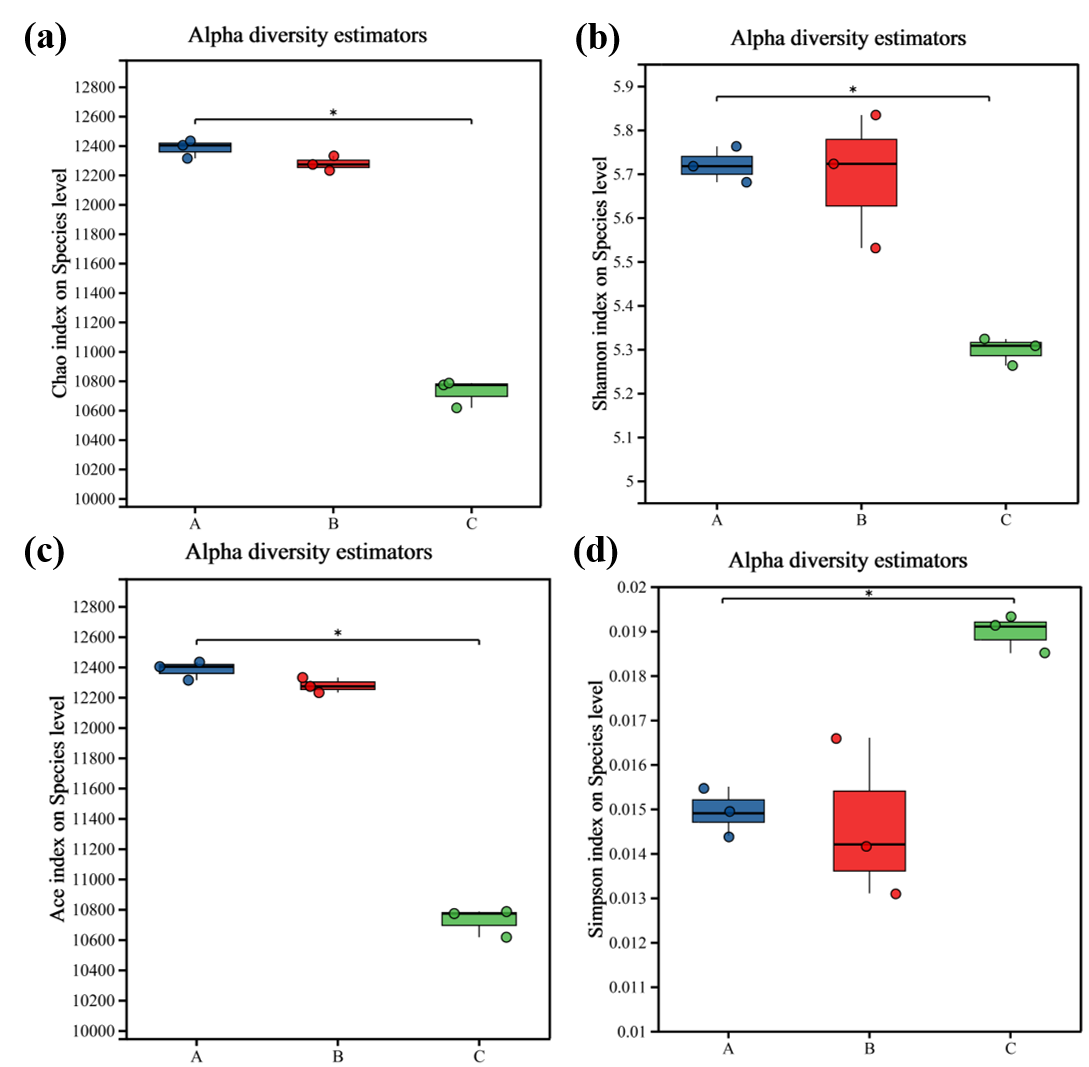


**Figure S4.** Reduction in bacterial community richness in response to AHL treatment. Boxplots of the (**a**) Chao index, (**b**) Shannon index, (**c**) Ace index, and (**d**) Simpson index at the OTU level for the blank control (Group A), solvent control (Group B), and AHL-treated (Group C) groups. Both indices are estimators of community richness (the number of different taxonomic units). Asterisks indicate significant differences (*P* < 0.05) based on Student's t-test.


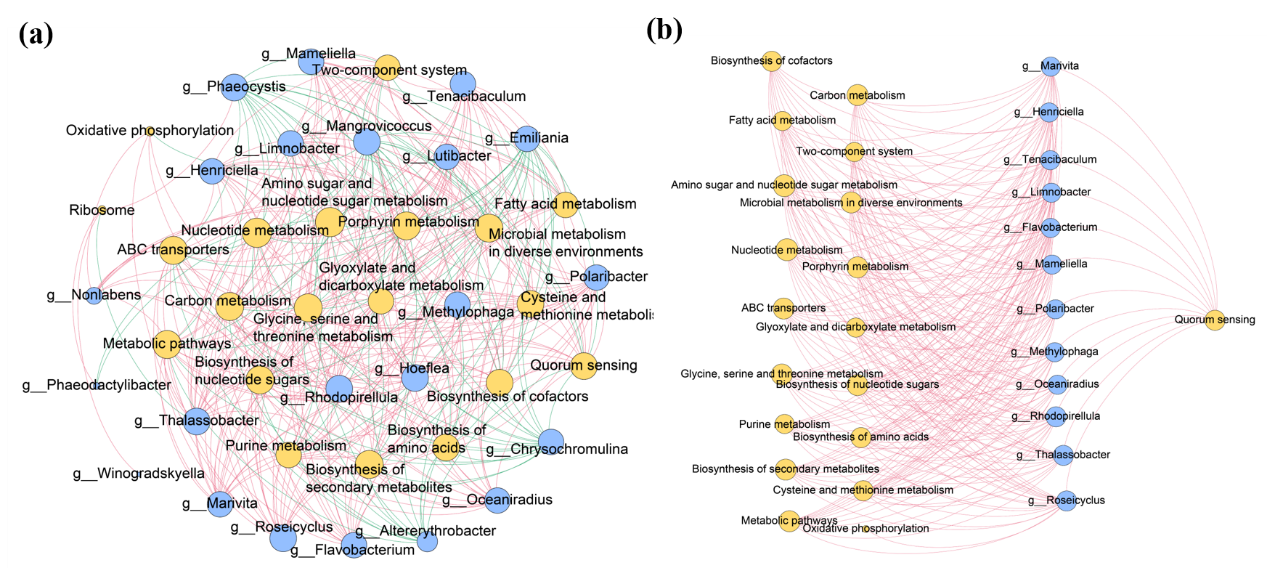


**Figure S5.** Network analysis of microbial taxa and their associated metabolic potentials. (**a**) The network depicts the putative associations between various microbial taxa (blue nodes) and key metabolic pathways or cellular functions (yellow nodes). (**b**) is a subgraph of (**a**), illustrating the taxonomic groups and functions associated with QS.
